# Supplementary material for: Proteomics Data Analysis for the Identification of Proteins and Derived Proteotypic Peptides of Potential Use as Putative Drought Tolerance Markers for Quercus ilex
Source: PubMed Central journal article supplement (PMC8003919; doi:10.3390/ijms22063191), 2021-03-21

## Supplementary Figure S1

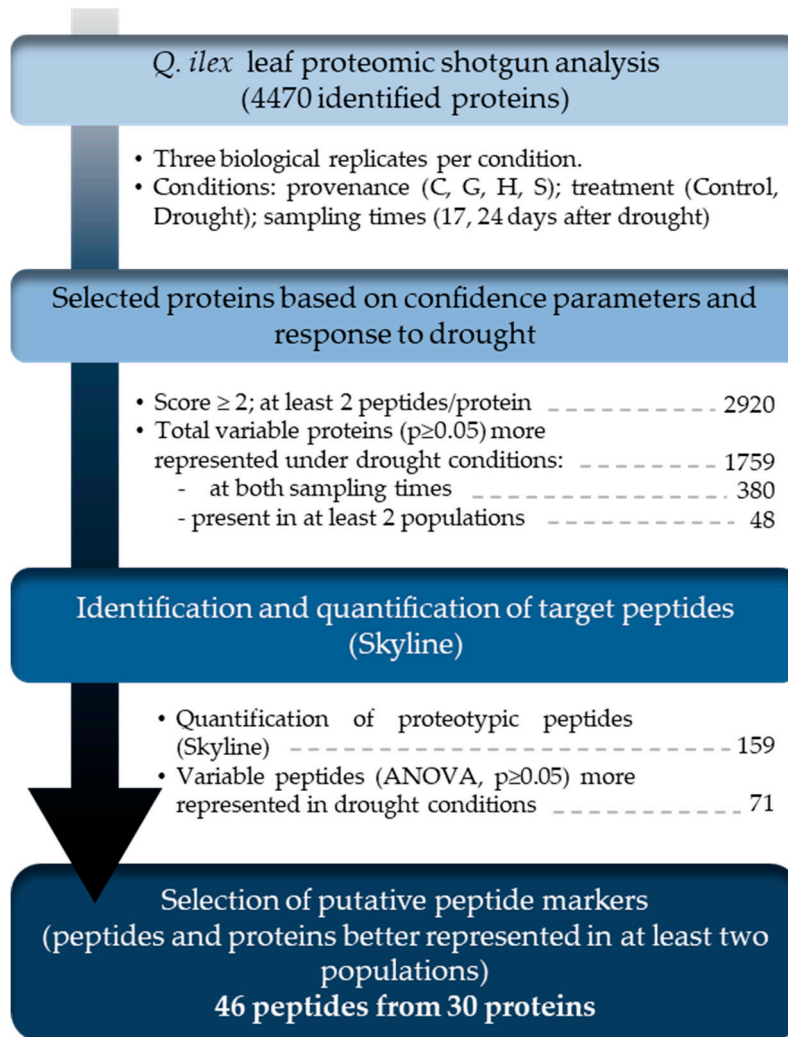

# Supplementary Figure S2

(A)

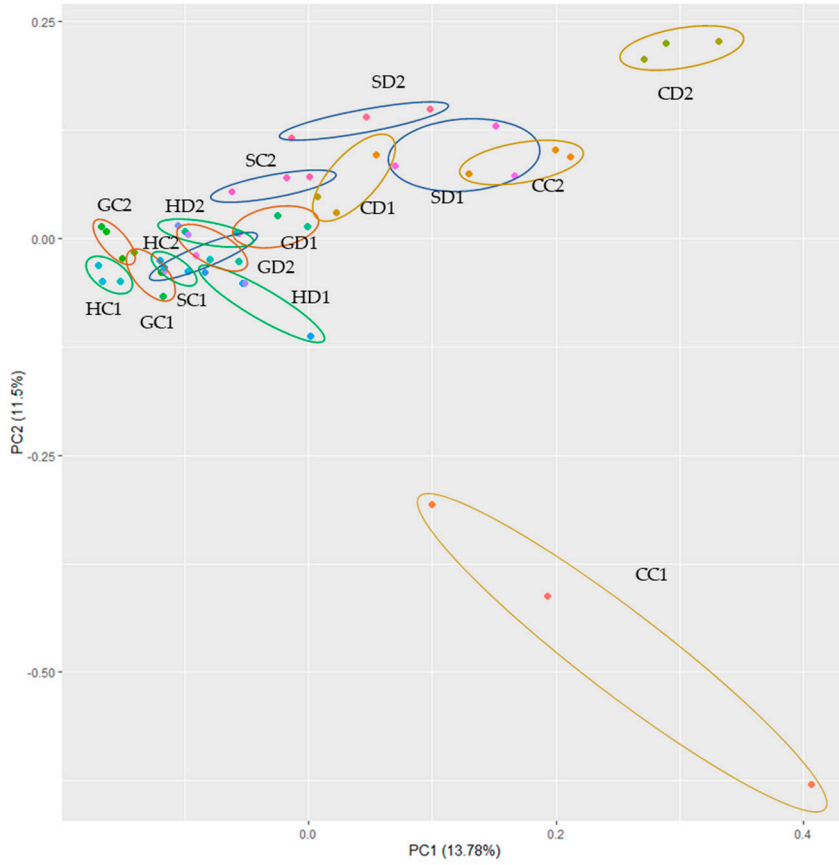

(B)

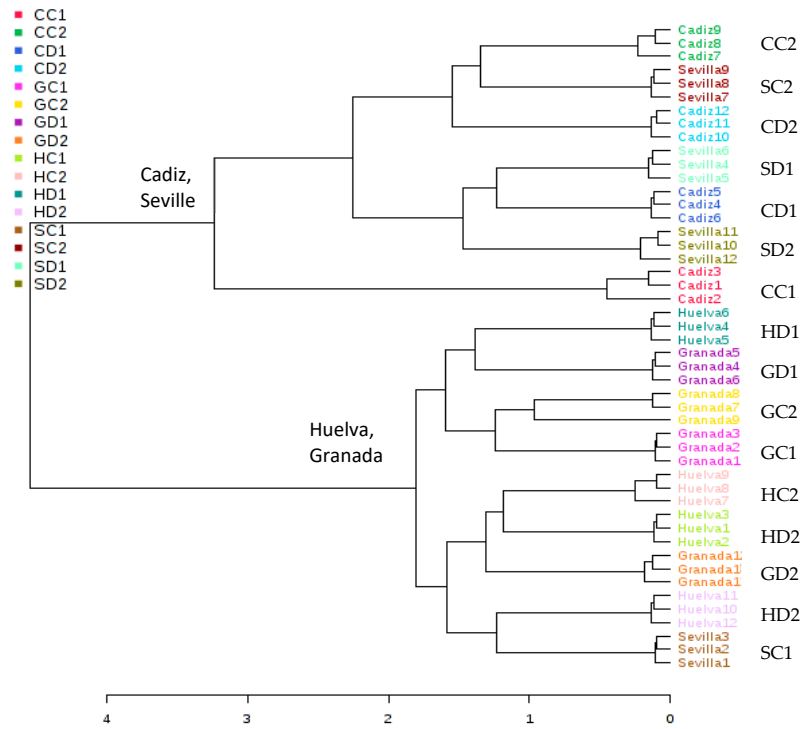

# Supplementary Figure S3

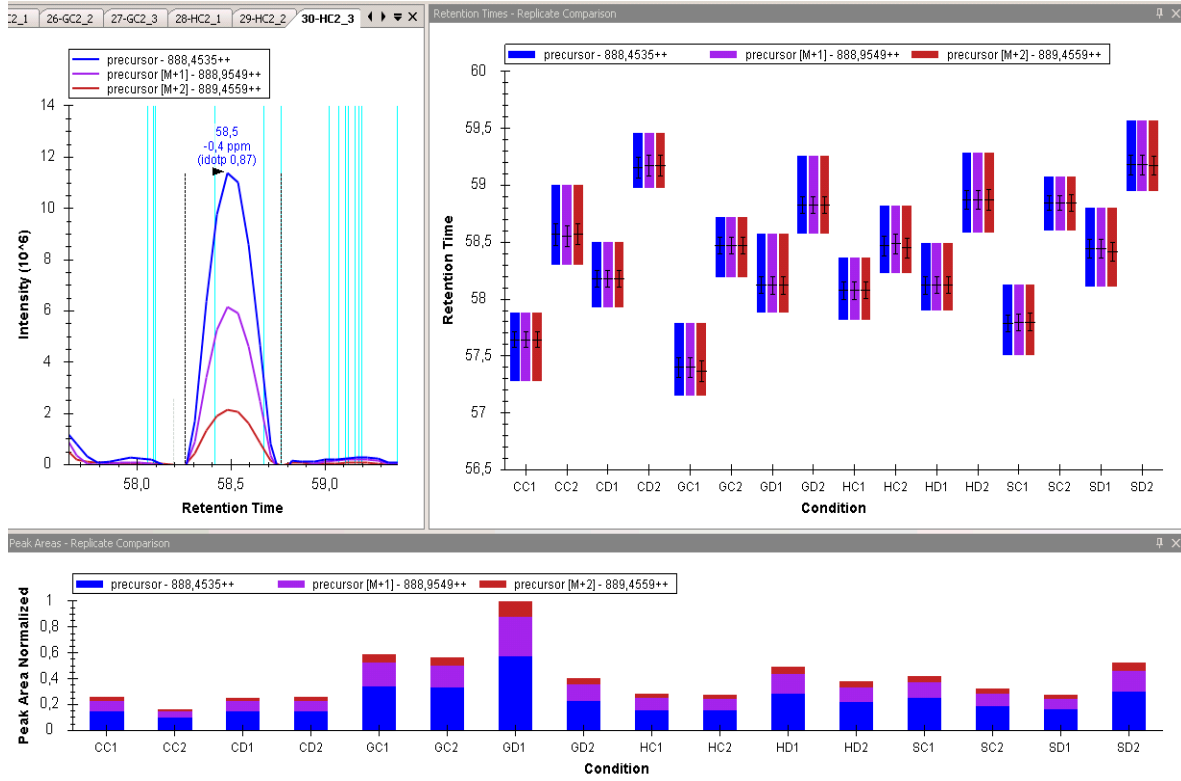

# Supplementary Figure S4

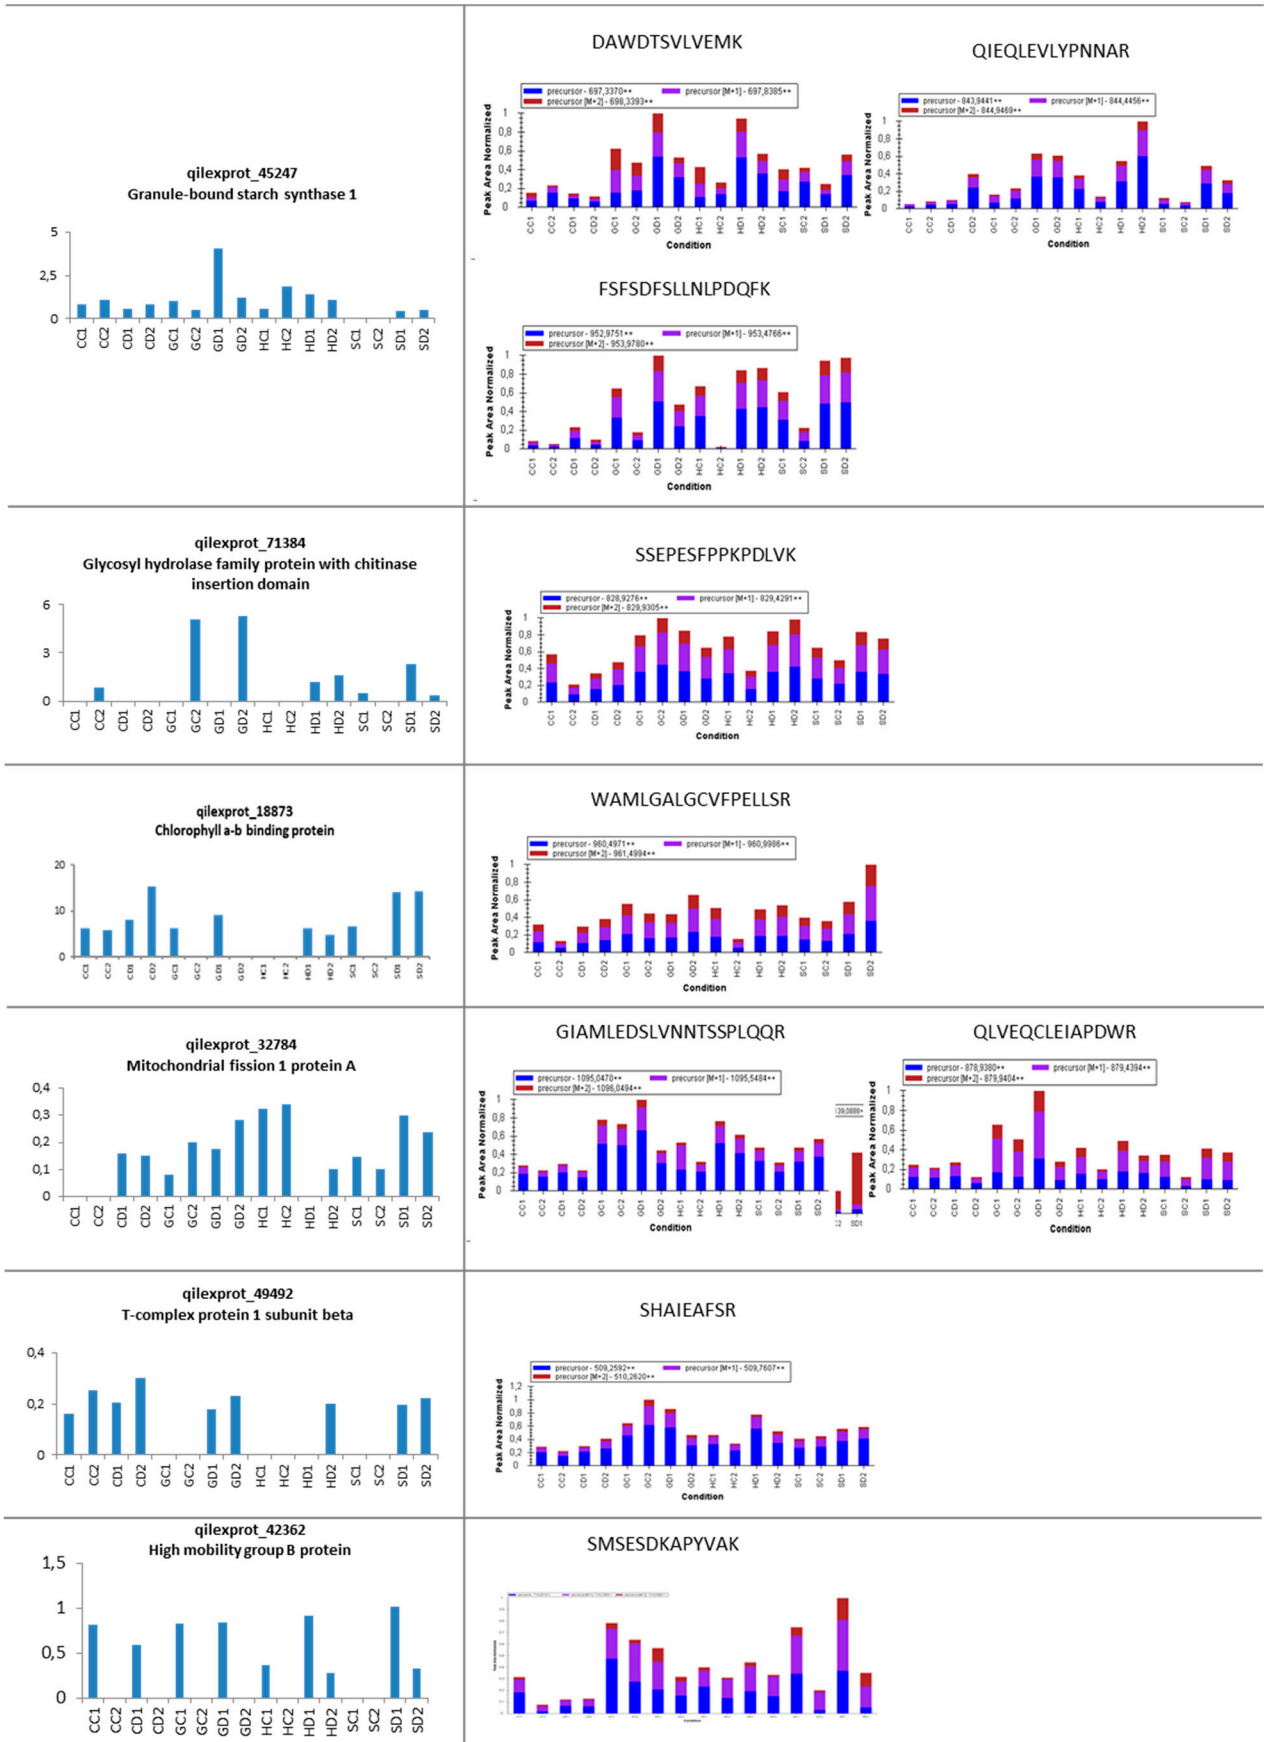

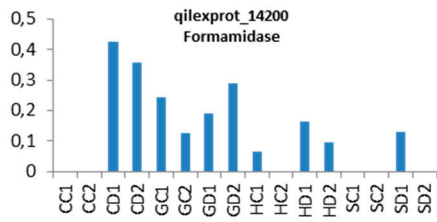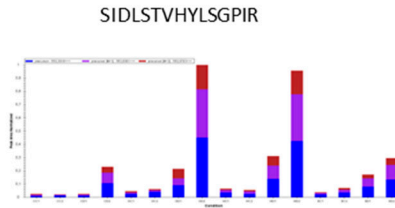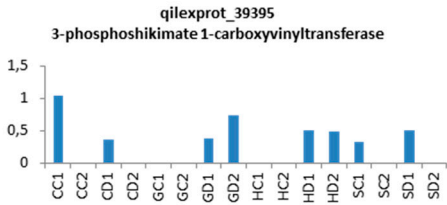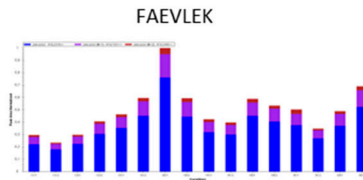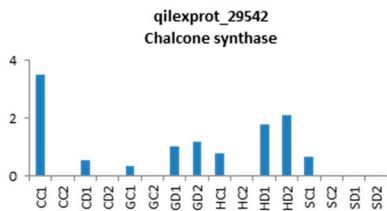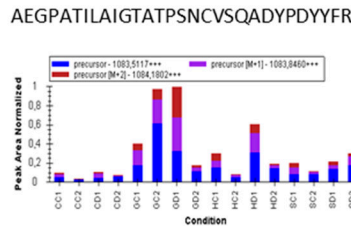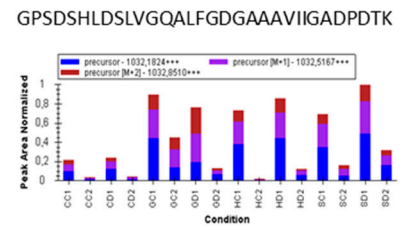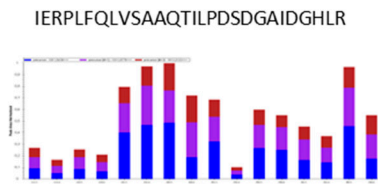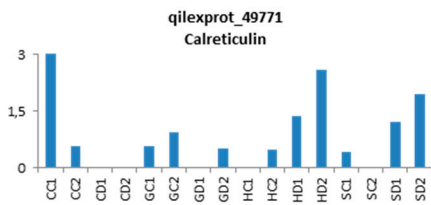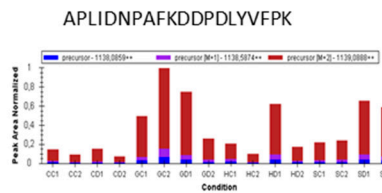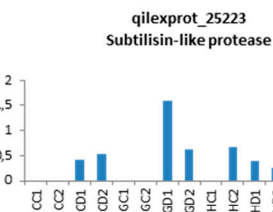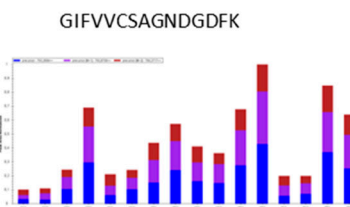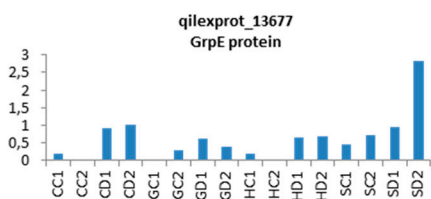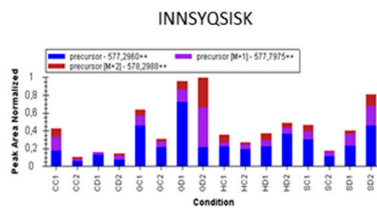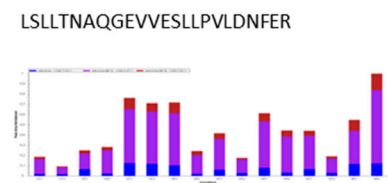

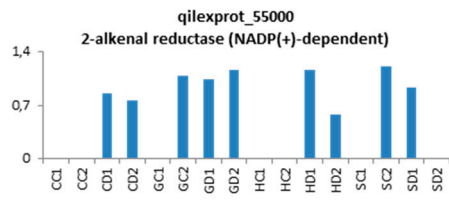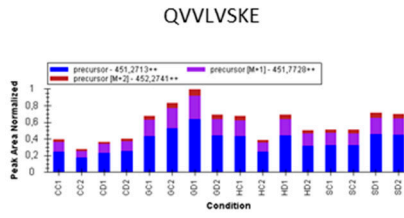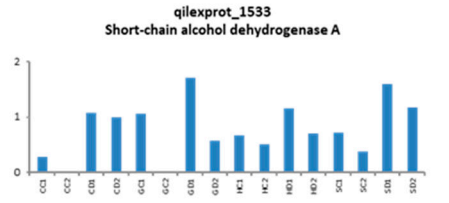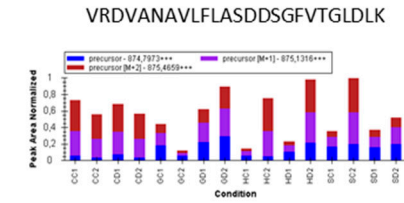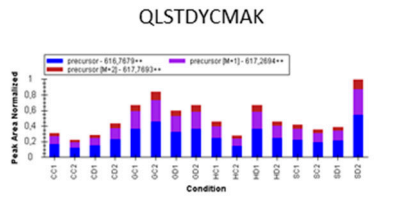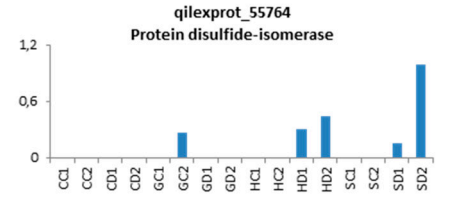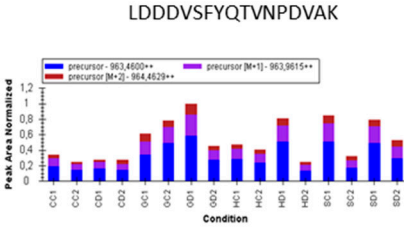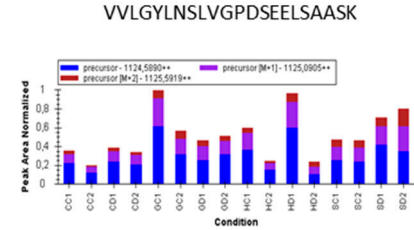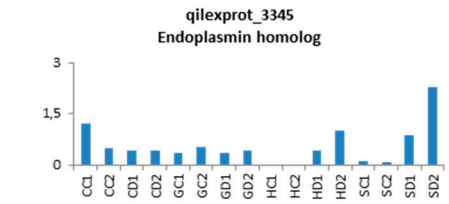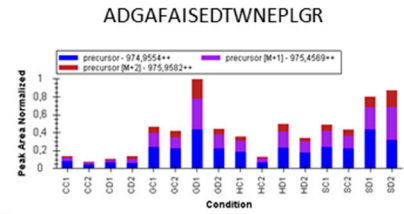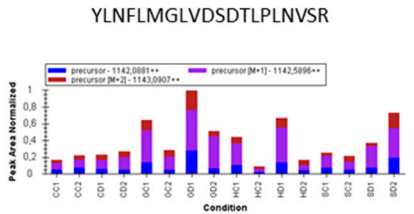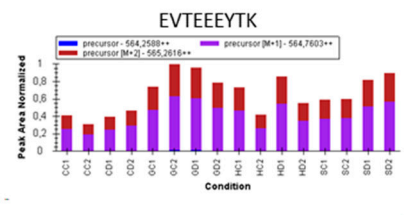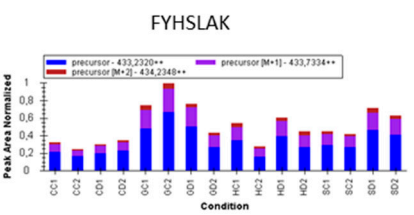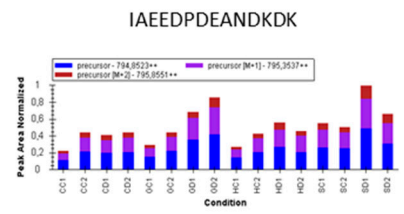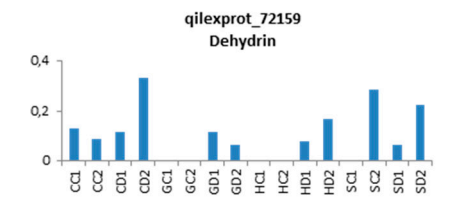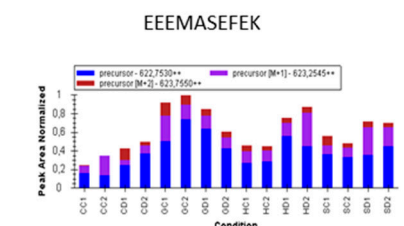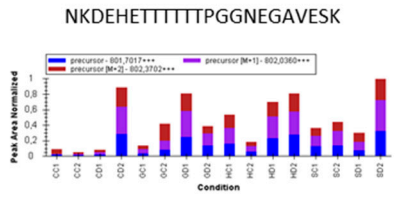

qilexprot\_48029  
AT3g51250/F24M12\_290

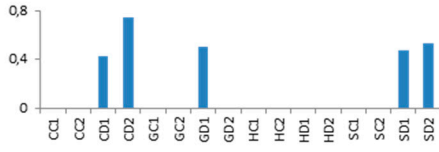

ELAENLPEDDTVSQTPTLQSSENVLVR

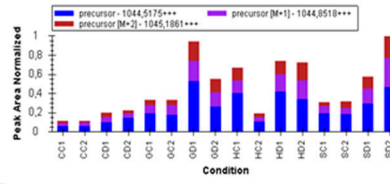

qilexprot\_8871  
Probable aldol-keto reductase 1

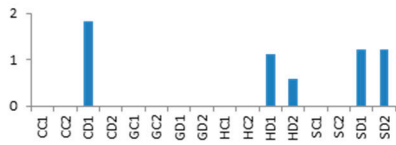

KGCTPSQLALAWVHHQK

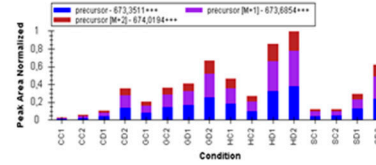

qilexprot\_19464  
Oligouridylylate-binding protein 1B

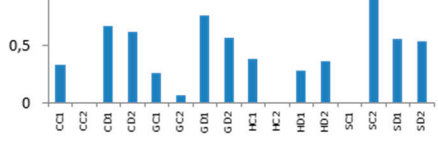

SVVELTNGSSEDGK

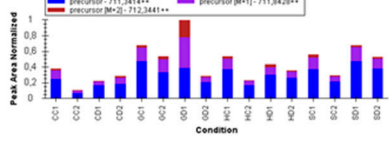

VNWAYASGQR

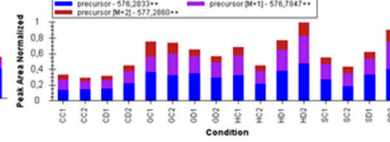

qilexprot\_70616  
BnaC03g49780D protein

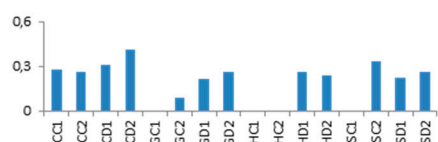

LITVTASENPDSR

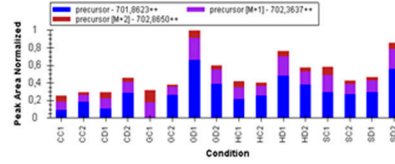

qilexprot\_26698  
Zinc finger protein VAR3

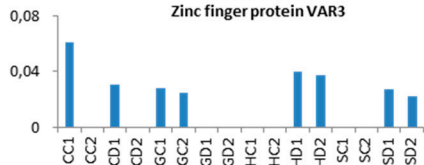

SVASNAIEWTGNASGSSVPDK

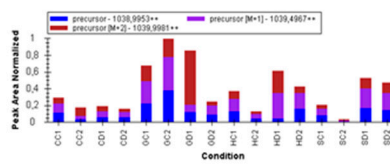

DKPESDGADLANK

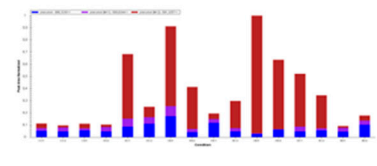

qilexprot\_2527  
Myb domain containing transcription regulator

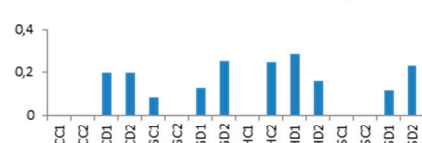

IEDIDAYPK

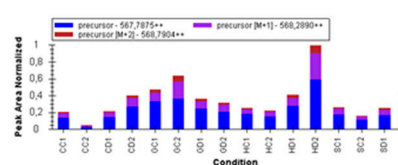

qilexprot\_7552  
Proliferation-associated protein 2G4

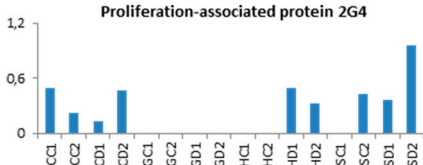

ALQLVVSECKPK

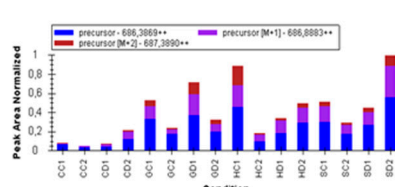

IVDVCEIGDSFIR

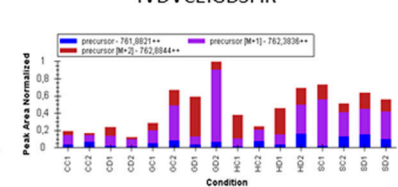



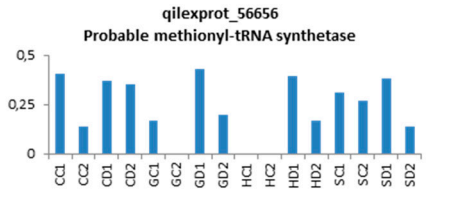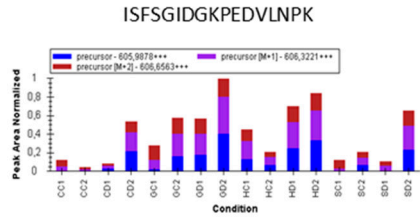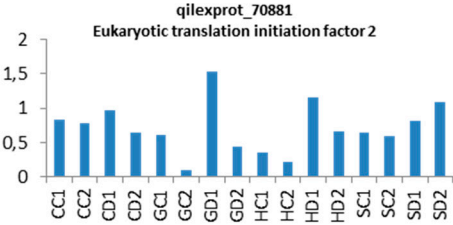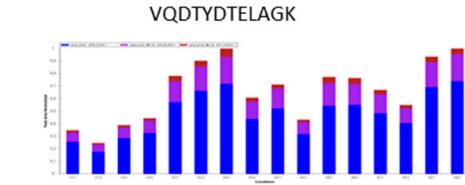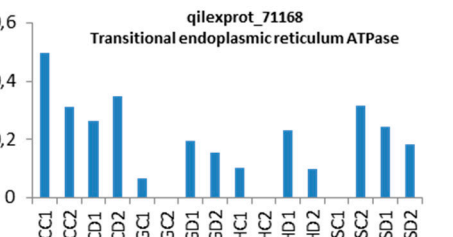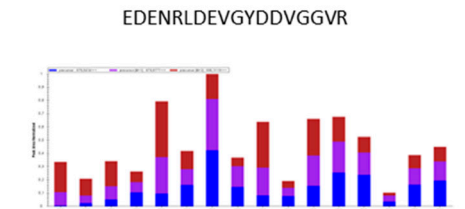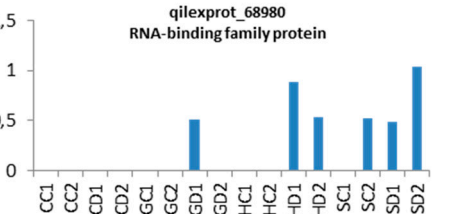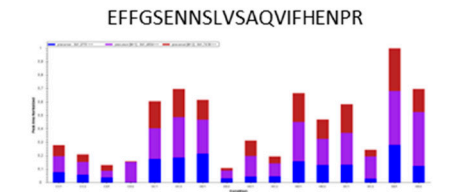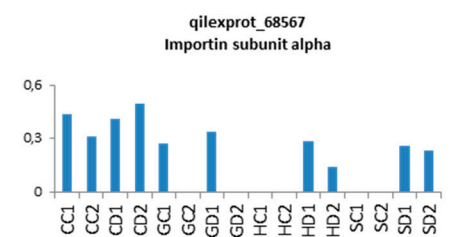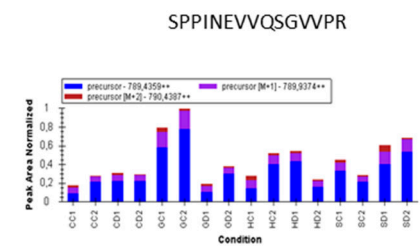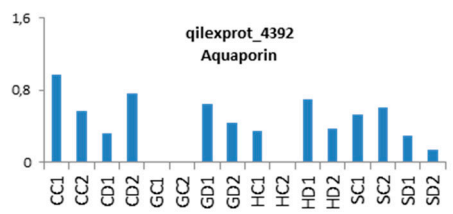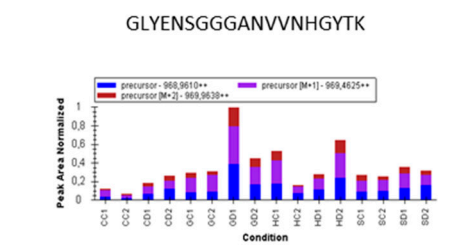



Supplementary Figure S5

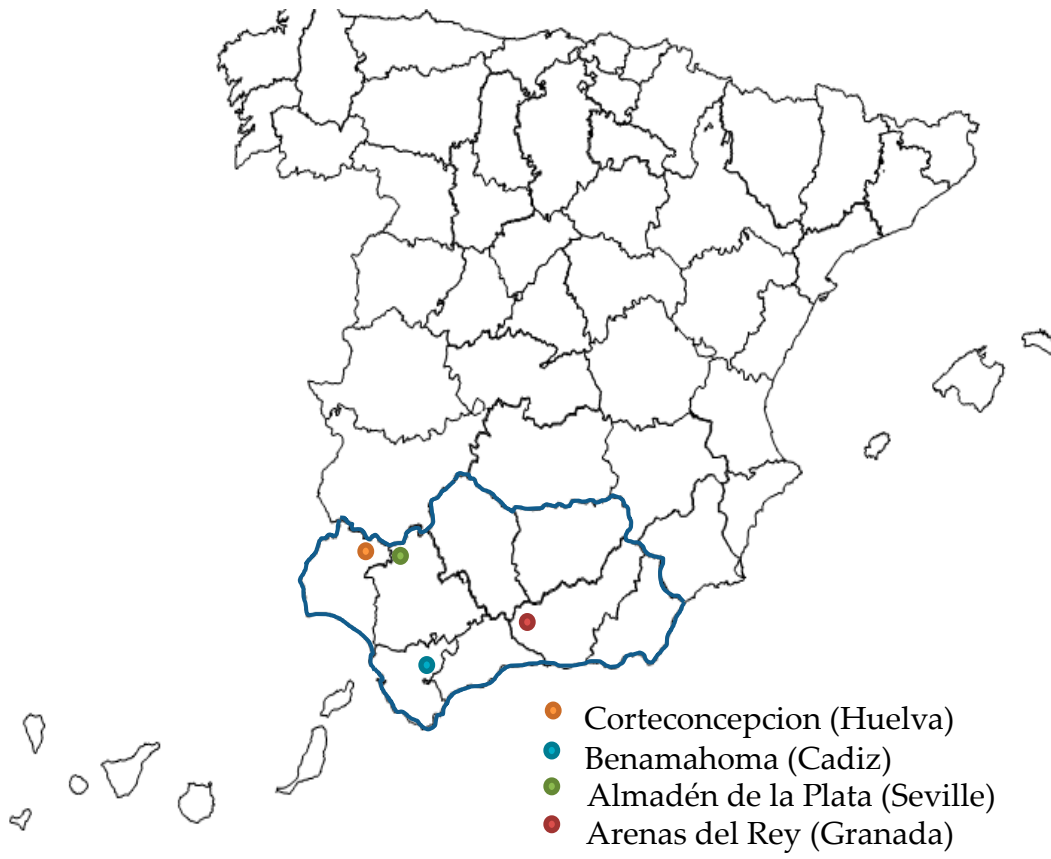

Supplementary Figure S6

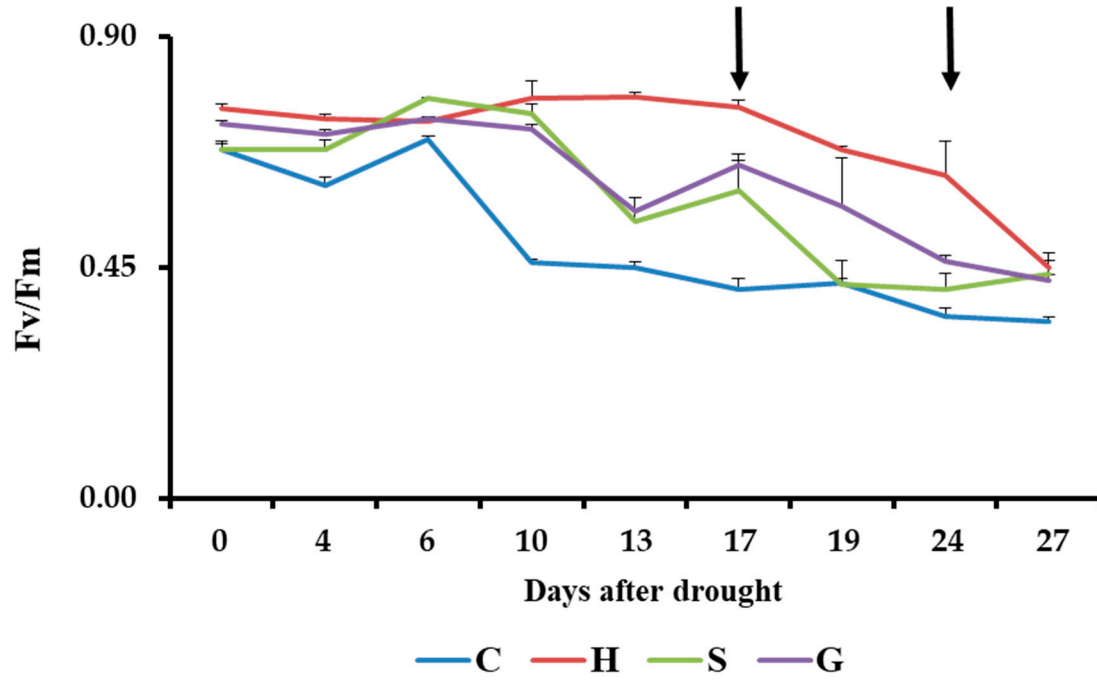

Supplementary Figure S7

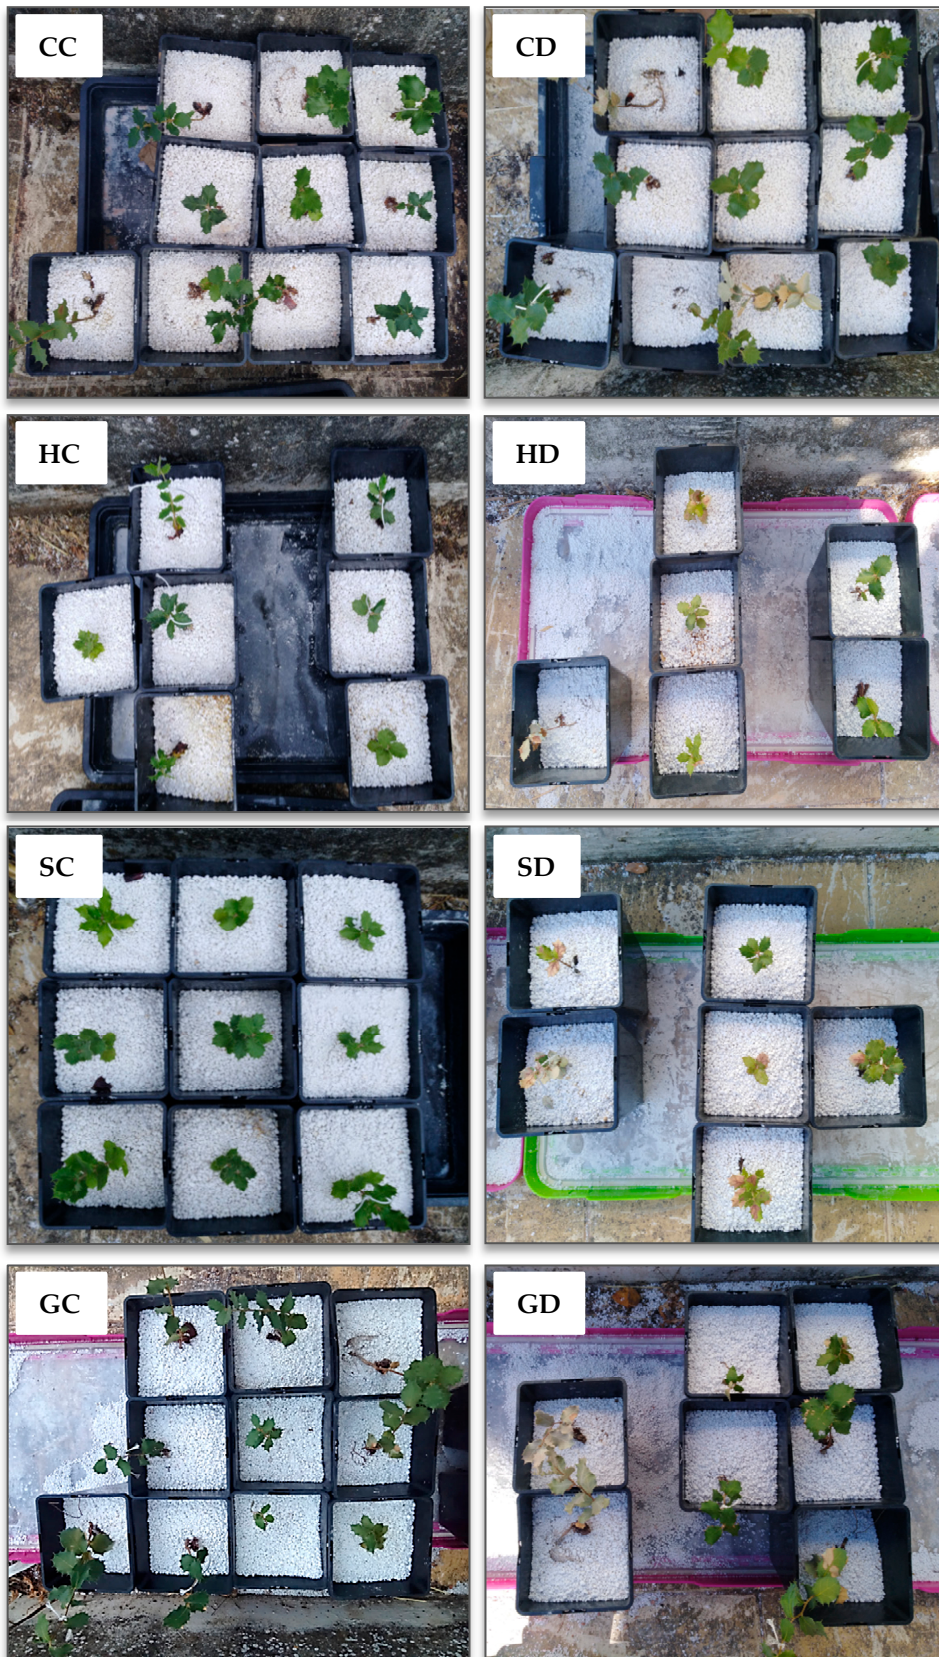

Supplement: ijms-22-03191-s001.pdf [file ijms-22-03191-s001.pdf]
